# Supplementary material for: High yield synthesis of amine functionalized graphene oxide and its surface properties
Source: Royal Society of Chemistry journal article supplement (doi:10.1039/c6ra12844k), 2016-01-01
Supplement: c6ra12844k1.pdf [file c6ra12844k1.pdf]

## Supplementary Information

### High Yield Synthesis Of Amine Functionalized Graphene Oxide And Its Surface Properties

Souvik Chakraborty<sup>1</sup>, Saikat Saha<sup>1</sup>, V.R. Dhanak<sup>2</sup>, Kallolmay Biswas<sup>3</sup>, Michel Barbezat<sup>4</sup>,  
Giovanni P. Terrasi<sup>4</sup>, and Amit K. Chakraborty<sup>1\*</sup>

<sup>1</sup>*Carbon Nanotechnology Lab, Department of Physics, National Institute of Technology  
Durgapur, Mahatma Gandhi Avenue, Durgapur-713209, West Bengal, India*

<sup>2</sup>*Department of Physics and Stephenson Institute for Renewable Energy, University of  
Liverpool, Liverpool, L69 3BX, United Kingdom*

<sup>3</sup>*Jubilant Chemsys Ltd., Sector 58, B-34, Noida-201301, Uttar Pradesh, India.*

<sup>4</sup>*Laboratory for Mechanical Systems Engineering, Empa, Swiss Federal Laboratories for  
Materials Science & Technology, Überlandstrasse 129, 8600 Dübendorf, Switzerland.*

\*Email of corresponding author: amitkc61@gmail.com

---

#### S1 - NMR Analysis

**Fig. S1** shows the <sup>1</sup>H NMR spectra obtained from GO-ButA recorded on a Bruker Ultrashield™ (400 MHz) NMR spectrometer calibrated to residual solvent peaks: proton (DMSO-D<sub>6</sub> 2.50 ppm). The appearance of a signal at 0.84 ppm indicates for CH<sub>3</sub>, while CH<sub>2</sub> protons are located at 1.22 ppm indicating the presence of the alkyl chains in the GO-ButA. The broad H signal of the secondary amide (–NH–R) appearing at 3.31 ppm <sup>S1</sup> further supports the formation of GO-ButA.

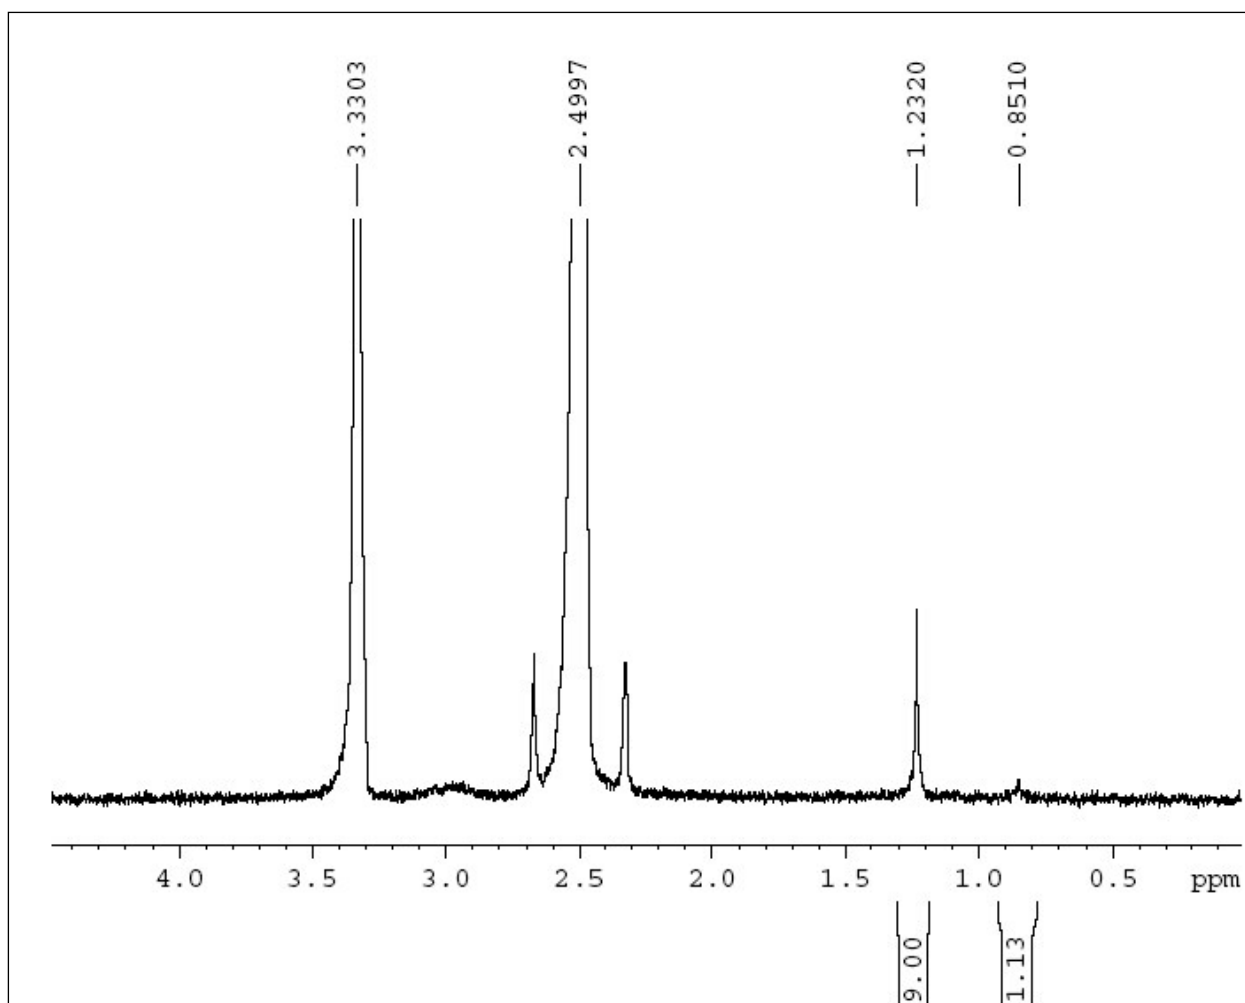

**Fig. S1:** NMR spectra of GO-ButA.

## S2 – Thermo Gravimetric Analysis (TGA) Analysis

TGA of GO and GO-ButA were carried out in a Perkin Elmer Simultaneous Thermal Analyzer, STA 6000 in an uncapped alumina crucible operated at a heating rate of 10°C/min in nitrogen atmosphere. **Fig. S2** shows that there is a significant weight loss below 100°C for GO (~11.4%) as compared to GO-ButA (~2.3%). This points to the presence of large amount of absorbed water in GO which disappear upon functionalization possibly due to increased hydrophobicity of the surfaces <sup>S2,S3</sup>. A sharp degradation in the weight of GO is witnessed around 200°C (~ 13.7 %) within the temperature range of 190 - 220°C which may be attributed to the removal of oxygen containing functionalities via pyrolysis <sup>S3,S4</sup>. A steady

decrease in the weight of GO-ButA is also observed from 200°C onwards which possibly indicate the removal of covalently bonded n-Butylamine. This finding is consistent with information present elsewhere in the literature which points towards a similar loss within 200 – 500°C <sup>S4</sup>.

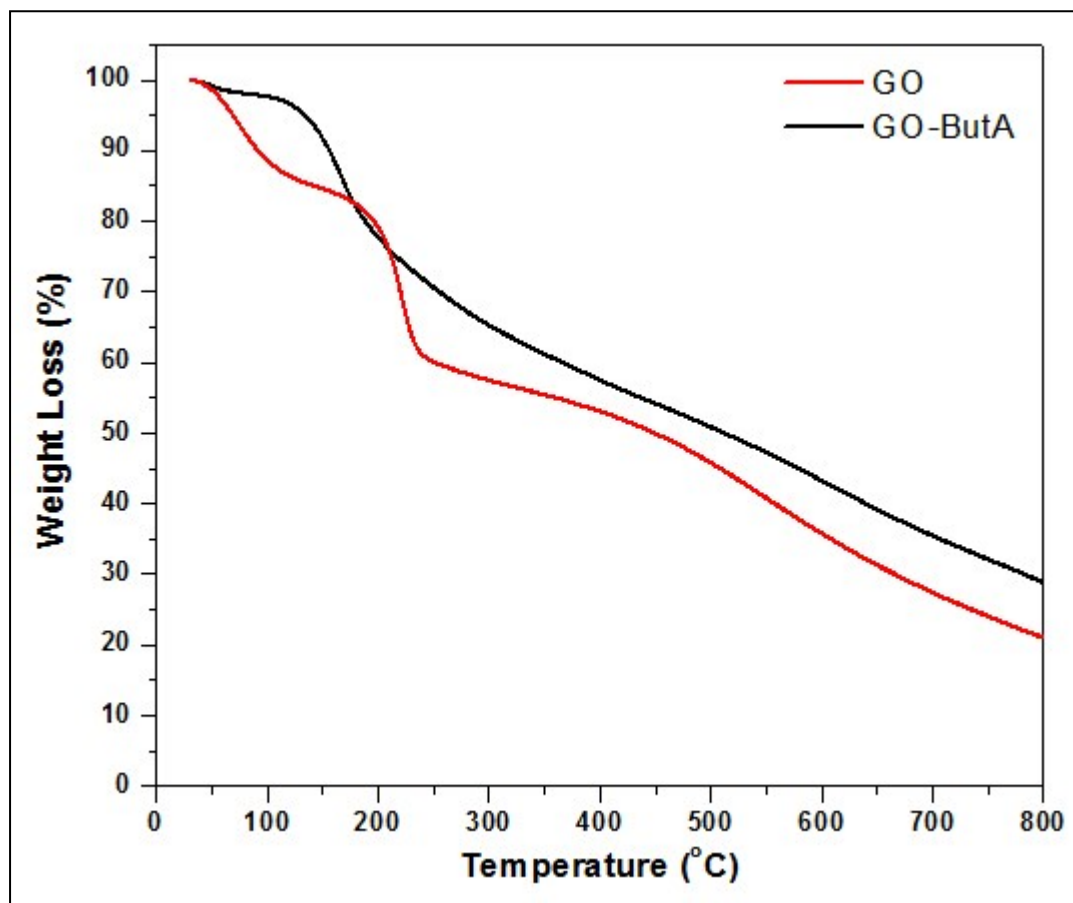

**Fig. S2:** TGA curves of GO and GO-ButA

**Reference:**

- [S1] W. Li, X.-Z. Tang, H.-B. Zhang, Z.-G. Jiang, Z.-Z. Yu, X.-S. Du, Y.-W. Mai, *Carbon*, 2011, **49**, 4724.
- [S2] J. Lin, Y. Liu and C-P. Wong, *Langmuir*, 2010, **26**, 16110.
- [S3] S. Stankovich, D.A. Dikin, R.D. Piner, K.A. Kohlhaas, A. Kleinhammes, Y. Jia, Y. Wu, S.T. Nguyen and R.S. Rouff, *Carbon*, 2007, **45**, 1558.

[S4] O.C. Compton, D.A. Dikin, K.W. Putz, L.C. Brinson and S.T. Nguyen, *Adv. Mater.*, 2010, **22**, 892.
